# Supplementary material for: Thermo-mechanical reversibility in a shape memory organic salt
Source: Royal Society of Chemistry journal article supplement (doi:10.1039/d2tc02554j), 2022-01-01
Supplement: d2tc02554j1.pdf [file d2tc02554j1.pdf]

## Thermo-Mechanical Reversibility in a Shape Memory Organic Salt

Subham Ranjan, Hisashi Honda\* and Satoshi Takamizawa\*

Department of Materials System Science, Graduate School of Nanobioscience,

Yokohama City University

22-2 Seto, Kanazawa-ku, Yokohama, Kanagawa 236-0027 (Japan)

E-mail: [hhonda@yokohama-cu.ac.jp](mailto:hhonda@yokohama-cu.ac.jp); [staka@yokohama-cu.ac.jp](mailto:staka@yokohama-cu.ac.jp)

| Table of contents:                | Page    |
|-----------------------------------|---------|
| Crystal characterization          | S3      |
| Mechanical deformation analysis   | S3-S4   |
| Thermal analysis                  | S5      |
| Crystallographic studies          | S5-S8   |
| Three-point bending tests         | S9-S10  |
| Solid-state NMR analysis          | S11-S13 |
| Powder X-ray diffraction analysis | S14     |
| Supporting references             | S14     |

### **Other supporting material**

Stress- and thermal-induced deformation behaviors under the microscope:

**Movie S1.** Thermal-induced mechanical deformation  $\alpha \rightarrow \beta$  and  $\beta \rightarrow \alpha$  transformation and shearing-induced mechanical deformation  $\alpha \rightarrow \beta$  and  $\beta \rightarrow \alpha$  transformation.

**Movie S2.** Shearing-induced mechanical deformation  $\alpha$  to  $\beta$  at 32 °C temperature and thermal-induced reverse transformation  $\beta \rightarrow \alpha$  at 39 °C temperature.

**Movie S3.** Stress-displacement test on  $(\bar{1}12)$  and  $(\bar{1}1\bar{1})$  planes at 32 °C and 39 °C, respectively.

**Movie S4.** Stress-displacement test on  $(\bar{1}12)$  plane at 38.9 °C temperature.

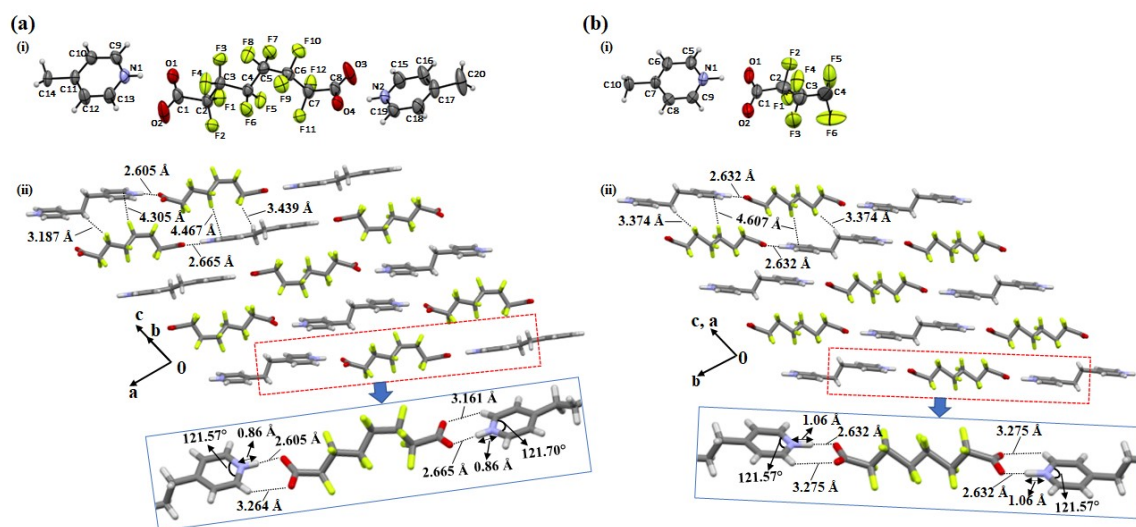

**Figure S1.** ORTEP view and crystal packing of (a)  $\alpha$  form and (b)  $\beta$  form. (a)(i) and (b)(i) are the ORTEP view of  $\alpha$  form and  $\beta$  form with 50% probability of displacement ellipsoids, respectively. Both forms have triclinic system with  $P\bar{1}$  space group with  $Z = 2$ . (a)(ii) and (b)(ii) are the crystal packing of  $\alpha$  form and  $\beta$  form with the analysis of synthon, C—N—C bonds and N—H distances, respectively.

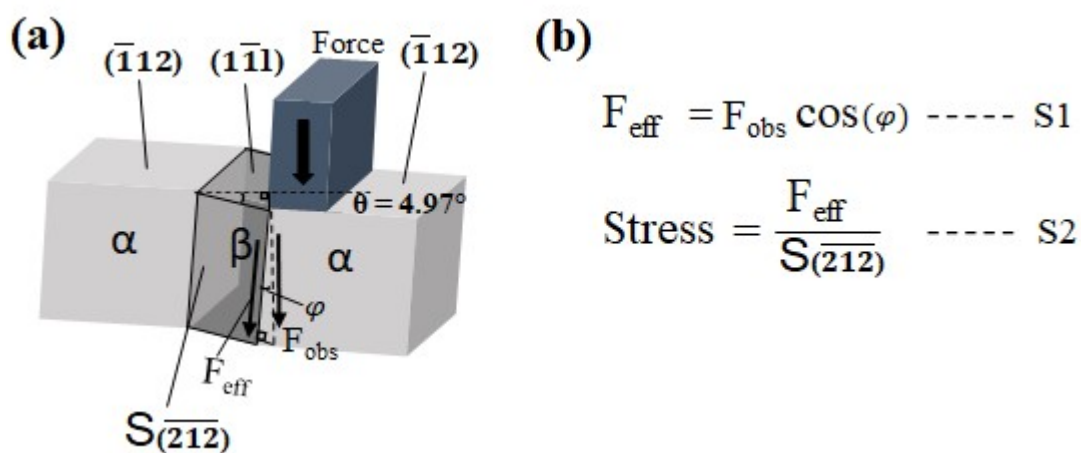

**Figure S2.** (a) Experimental setup and (b) Calculation of effective stress. Equations S1 and S2 are the calculation of effective force and effective stress, respectively.

**Table S1.** Comparison of mechanical parameters of organosuperelastic crystals.

| Compounds                                                        | Mechanism        | $\sigma_f$ / MPa | $\sigma_r$ / MPa | $E_s$ / kJ m <sup>-3</sup> | $\eta$ | $\chi$ | $\theta$ / ° |
|------------------------------------------------------------------|------------------|------------------|------------------|----------------------------|--------|--------|--------------|
| Terephthalamide <sup>1</sup>                                     | Phase transition | 0.50             | 0.46             | 62                         | 0.93   | 0.13   | 6.5          |
| 5-Tetrabutyl-n-phosphonium tetraphenylborate <sup>2</sup>        | Phase transition | 0.53             | 0.42             | 50                         | 0.79   | 0.10   | 5.3          |
| 7-Chloro-2-(2'-hydroxyphenyl)imidazo[1,2-a]pyridine <sup>3</sup> | Phase transition | 1.53             | 0.66             | 560                        | 0.43   | 0.51   | 42.1         |
| Salt ( <b>32</b> °C)                                             | Phase transition | 2.27             | 1.65             | 18                         | 0.72   | 0.01   | 4.97         |
| Salt ( <b>47</b> °C)                                             | Phase transition | 3.21             | 3.07             | 26                         | 0.92   | 0.01   | 4.97         |

Mechanism of superelasticity: mechanical twinning and mechanically-induced phase transition. Effective shear stress for deformation: proceeding in the forward ( $\sigma_f$ ) and reverse ( $\sigma_r$ ) directions. Energy storage density ( $E_s = W_{in}/V$ ). The symbols  $W_{out}$  and  $V$  represent the output work and volume, respectively, in a deformed region of the specimen during superelastic deformation. Energy storage efficiency ( $\eta = W_{out}/W_{in}$ ) where  $W_{in}$  represents input work. Superelastic index ( $\chi = 2E/(\sigma_f + \sigma_r)$ ).  $\theta$  represents the crystal bending angle.

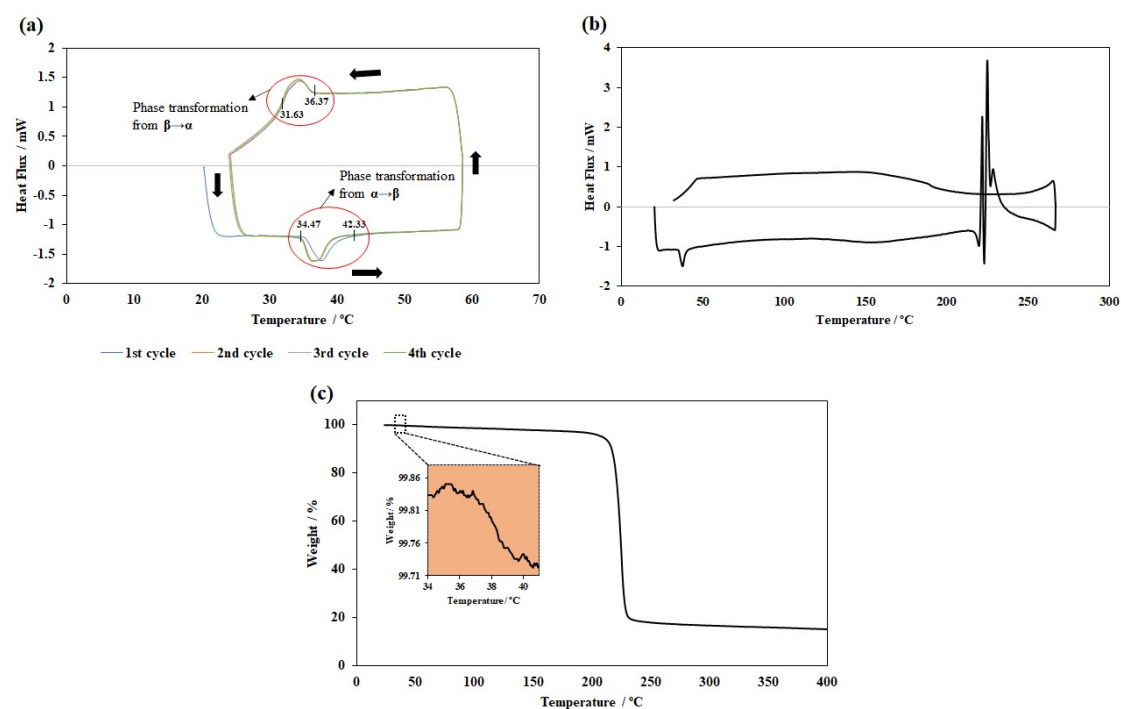

**Figure S3.** DSC curves of **1** during four consecutive heating-cooling cycles (a) and the one over decomposition (b). TG profile of **1** with the magnified region during a staircase weight loss due to  $\alpha$  to  $\beta$  transition (c).

**Table S2.** Crystallographic data of  $\alpha$  and  $\beta$ , and hydrate form of crystal **1**.

| Domain            | $\alpha$                                          | $\beta$                                     | Hydrate salt                 |
|-------------------|---------------------------------------------------|---------------------------------------------|------------------------------|
| $T / K$           | 305(2)                                            | 312(2)                                      | 123(2)                       |
| Empirical formula | $C_{20} H_{14} F_{12} N_2 O_4$<br>(Mother Domain) | $C_{10} H_7 F_6 N O_2$<br>(Daughter Domain) | $C_{14} H_{09} F_{12} N O_5$ |
| Crystal system    | triclinic                                         | triclinic                                   | triclinic                    |

| Space group                              | $P\bar{1}$                                                  | $P\bar{1}$                                                | $P\bar{1}$                                                 |
|------------------------------------------|-------------------------------------------------------------|-----------------------------------------------------------|------------------------------------------------------------|
| $a/\text{\AA}$                           | 9.2422(2)                                                   | 7.1050(3)                                                 | 9.0200(5)                                                  |
| $b/\text{\AA}$                           | 9.2641(2)                                                   | 8.9389(4)                                                 | 9.6306(5)                                                  |
| $c/\text{\AA}$                           | 13.4983(4)                                                  | 9.3188(4)                                                 | 11.2785(6)                                                 |
| $\alpha /^\circ$                         | 84.1350(10)                                                 | 84.101(2)                                                 | 68.659(2)                                                  |
| $\beta /^\circ$                          | 74.7540(10)                                                 | 82.567(2)                                                 | 73.934(2)                                                  |
| $\gamma /^\circ$                         | 85.0570(10)                                                 | 73.593(2)                                                 | 88.879(2)                                                  |
| $V / \text{\AA}^3$                       | 1107.10(5)                                                  | 561.61(4)                                                 | 873.50(8)                                                  |
| $Z$                                      | 2                                                           | 2                                                         | 2                                                          |
| $\rho_{\text{calcd}} [\text{g cm}^{-3}]$ | 1.723                                                       | 1.698                                                     | 1.898                                                      |
| $F(000)$                                 | 576                                                         | 288                                                       | 496                                                        |
| $\mu [\text{mm}^{-1}]$                   | 0.185                                                       | 0.183                                                     | 0.221                                                      |
| index ranges                             | $-11 \leq h \leq 10, -8 \leq k \leq 11, -12 \leq l \leq 16$ | $-6 \leq h \leq 8, -10 \leq k \leq 10, -8 \leq l \leq 11$ | $-9 \leq h \leq 10, -11 \leq k \leq 8, -13 \leq l \leq 13$ |
| Reflections collected                    | 7282                                                        | 3640                                                      | 6170                                                       |
| Goodness of fit                          | 1.023                                                       | 1.048                                                     | 1.108                                                      |
| $R_1(I > 2\sigma \text{ (all})$          | 0.0654                                                      | 0.0919                                                    | 0.0346                                                     |

|                                |         |         |         |
|--------------------------------|---------|---------|---------|
| data))                         |         |         |         |
| $wR_2(I > 2\sigma$ (all data)) | 0.2068  | 0.2985  | 0.1115  |
| CCDC No.                       | 2168787 | 2168788 | 2168789 |

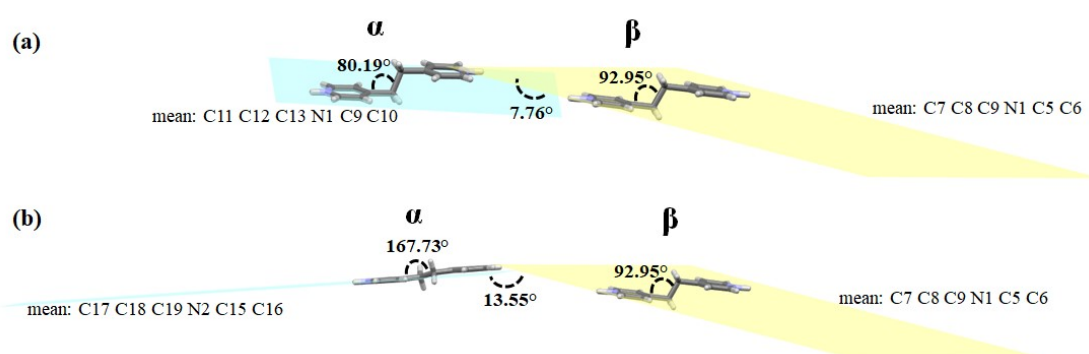

**Figure S4.** Torsional and dihedral angles on and between bipyrindines: **(a)** bipyrindine (A) moiety of  $\alpha$  form was compared with bipyrindine (A) moiety of  $\beta$  form, and **(b)** bipyrindine (A') moiety of  $\alpha$  form was compared with bipyrindine (A) moiety of  $\beta$  form.

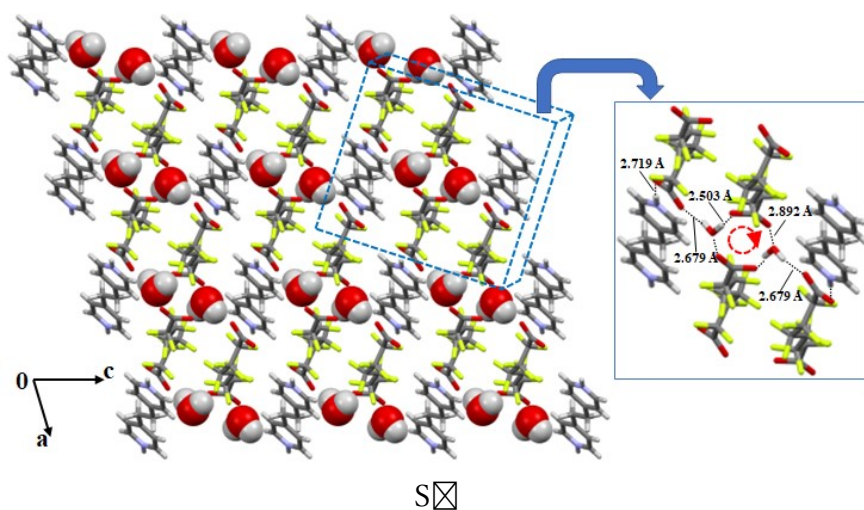

**Figure S5.** Crystal packing of salt hydrate along the b-axis (water molecules with a space fill model). The inset highlights the 10-membered ring ( $R_4^4(10)$ ) in the hydrogen bonding network with a capped sticks model.

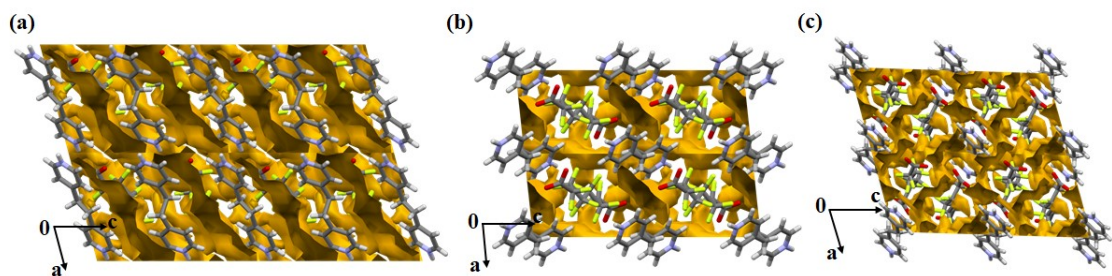

**Figure S6.** Void surfaces (a)  $\alpha$  form, (b)  $\beta$  form, and (c) hydrate form.

**Table S3:** Void volume of unit cell volume and % empty space in  $\alpha$  and  $\beta$ , and hydrate forms.

| S.No.         | Volume<br>( $\text{\AA}^3$ ) | % Empty space of unit<br>cell vol. |
|---------------|------------------------------|------------------------------------|
| $\alpha$ form | 175.10                       | 15.8                               |
| $\beta$ form  | 79.67                        | 14.2                               |
| Hydrated form | 110.11                       | 12.6                               |

**Three-Point Bending Tests.** Variable temperature three-point bending test experiments were conducted by using a universal testing machine coupled with a thermal controlled stage. A single crystal was put on two-point support and a metal-blade jig was used to apply stress to the crystal (Fig. S5). At a displacement rate of  $3 \text{ m sec}^{-1}$ , the jig pushed the crystal face ( $01\bar{2}/0\bar{1}2$  in  $\alpha$  form and  $\bar{1}01/10\bar{1}$  in  $\beta$  form) downward (press). The tension was released after bending, and the deformation behavior was observed using a polarized

microscope. The displacement with respect to the applied force is calculated using the three-point bending test. The following equation, where L is the support span (mm) and D is the deflection of the center, is then used to convert it to stress and strain (mm).

$$\text{Stress} = \frac{3 \times \text{Force} \times L}{2 \times \text{width} \times \text{height}^2} \dots\dots\dots \text{S1}$$

$$\text{Strain} = \frac{6 \times D \times \text{height}}{L^2} \dots\dots\dots \text{S2}$$

$$\text{Elastic Modulus} = \frac{\text{Stress}}{\text{Strain}}$$

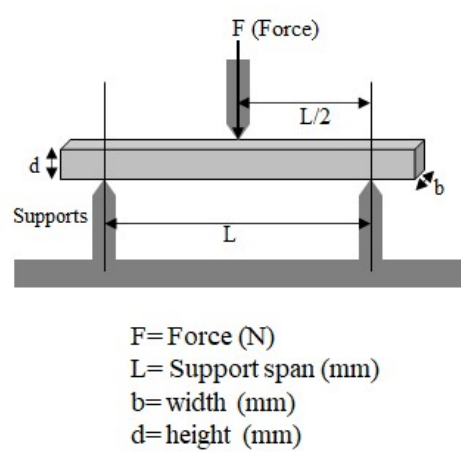

**Figure S7.** Experimental setup. A single-crystal specimen was supported on two points, and a metal-blade jig was used to apply the load to the crystal.

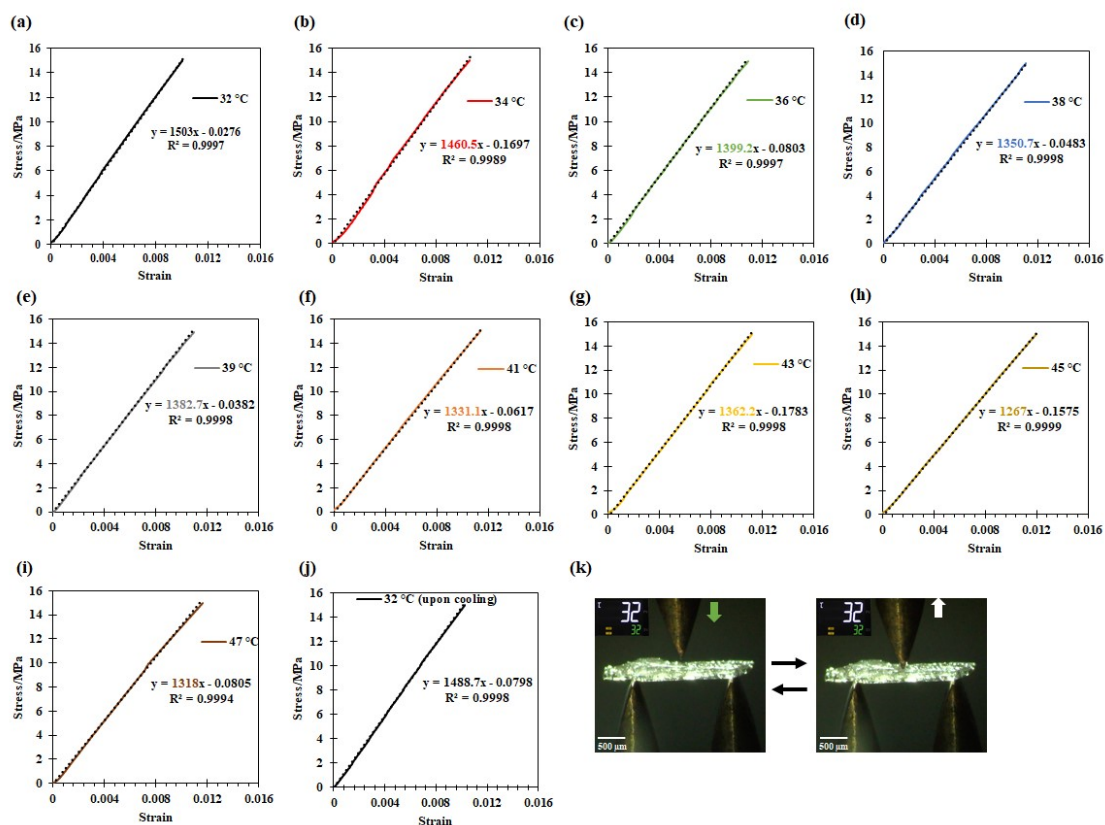

**Figure S8.** Stress-Strain curves of crystal **1** recorded by three-points bending at 32 to 47 °C with the slope gradient giving elastic modulus.

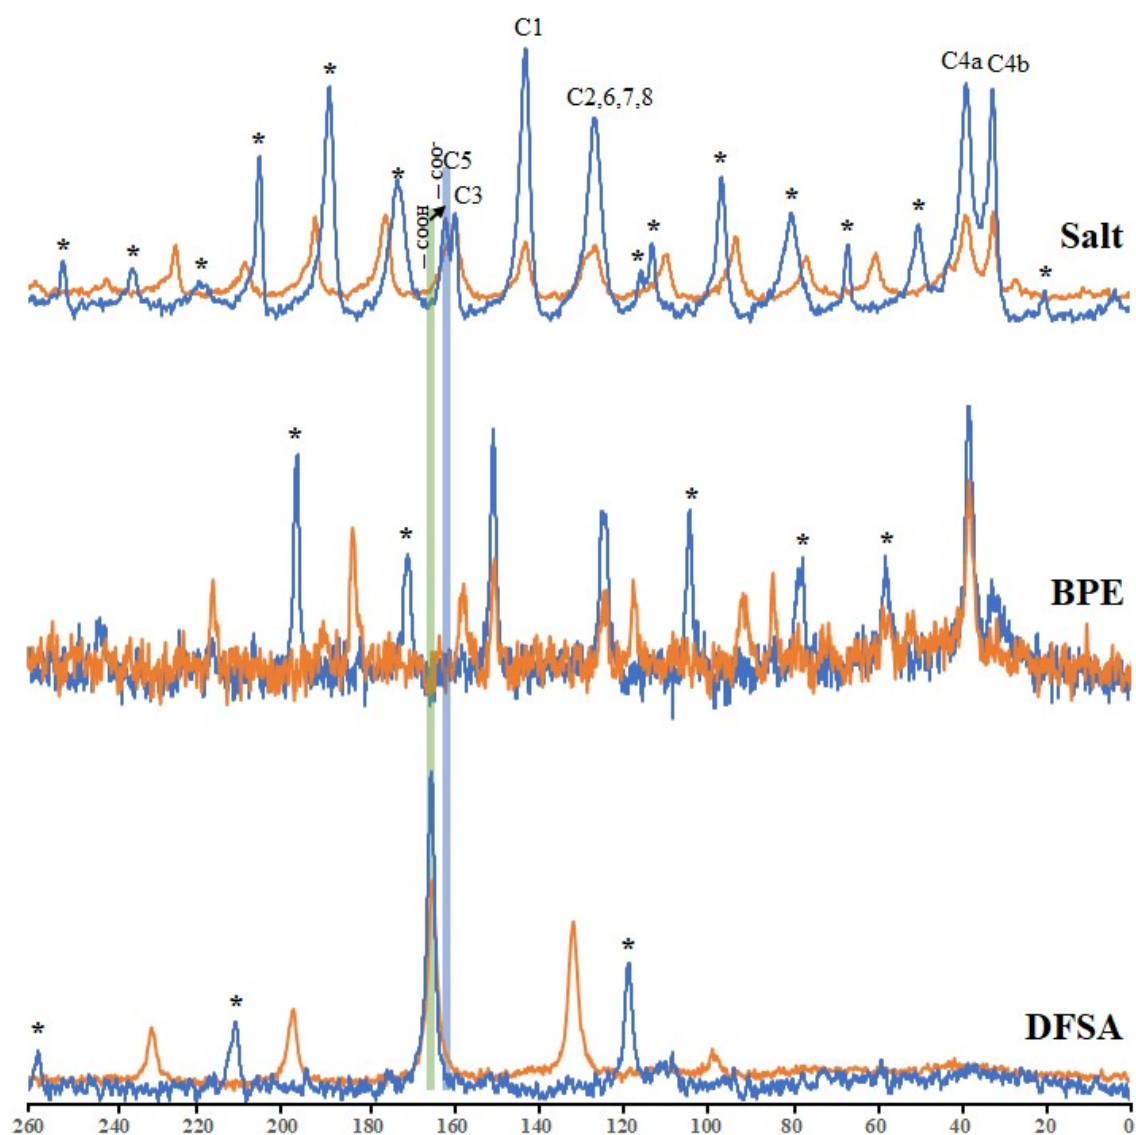

**Figure S9.** The Solid-state  $^{13}\text{C}$  CP/MAS NMR spectrum of crystal **1**, 1,2-bis (4-pyridyl) ethane (BPE) and dodecafluorosuberic acid (DFSA) measured at 5 kHz (orange) and 7 kHz (blue) at room temperature. Asterisks denote the spinning sidebands. The up-field shift from 164.6 ppm to 161.8 ppm in the carbonyl carbon of the DFSA is colored in light green and blue, respectively.

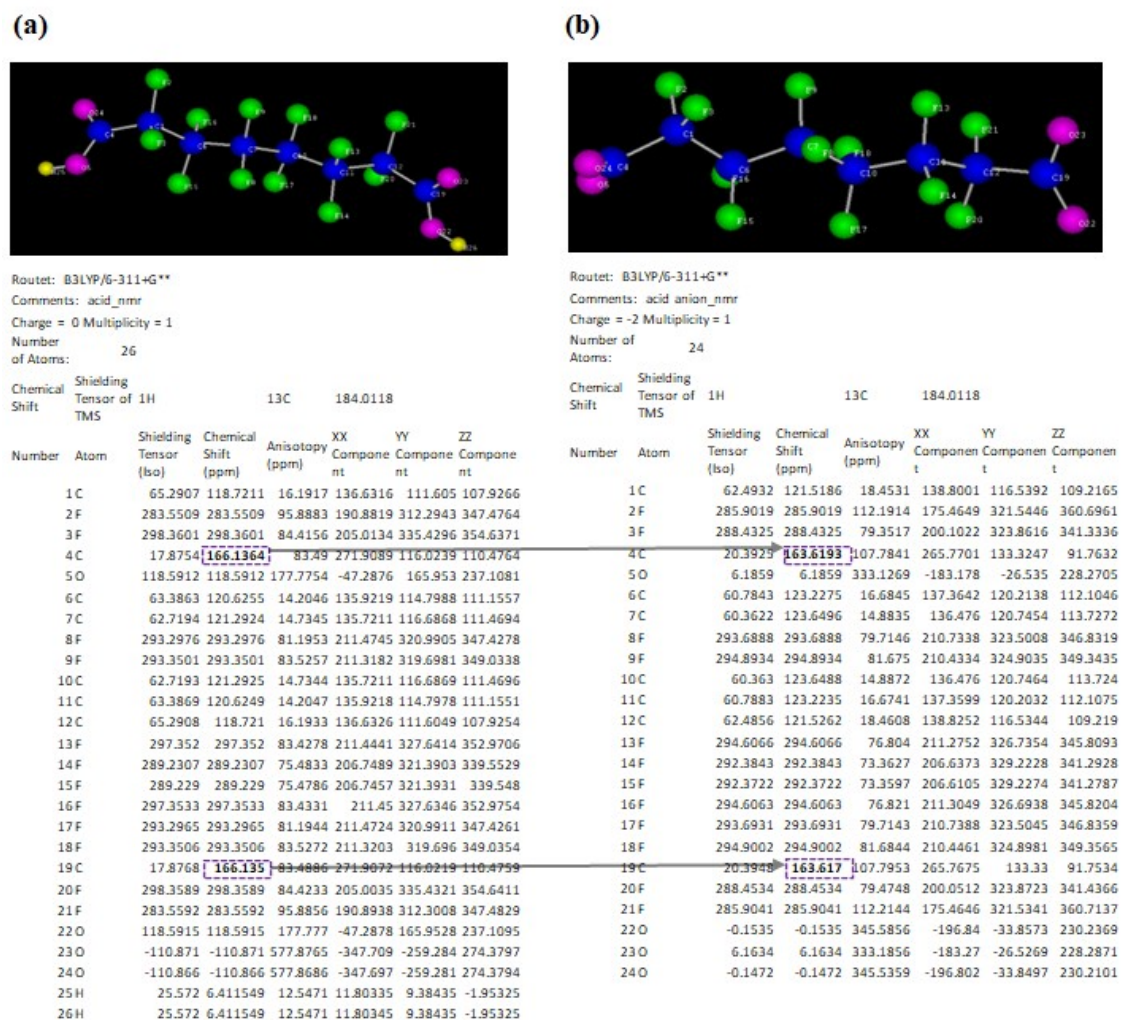

**Figure S10.** A B3LYP/6311+G\*\* function was used to estimate the  $^{13}\text{C}$  NMR peaks of dodecafluorosuberic acid in (a) neutral and (b) anion form. The highlighted values indicate the up-field shift in the carbonyl carbon peak of the dodecafluorosuberic acid which was also seen in  $\alpha$  form of crystal **1**.

(a)

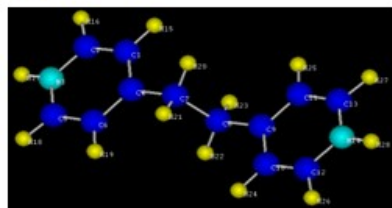

Routet: #p B3LYP/G-311+G\*\* nmr

Comments: Chair bipyrindine cation NMR

Charge = 2 Multiplicity = 1

Number of

Atoms: 28

| Chemical Shift | Shielding Tensor of TMS | 1H             | 13C                  | 184.0118         |              |              |              |
|----------------|-------------------------|----------------|----------------------|------------------|--------------|--------------|--------------|
| Number         | Atom                    | Shielding (bo) | Chemical Shift (ppm) | Anisotropy (ppm) | XX Component | YY Component | ZZ Component |
| 1C             |                         | 47.6256        | 136.3862             | 178.7626         | 241.0309     | 150.9165     | 17.21109     |
| 2C             |                         | 35.2612        | 148.7506             | 179.0992         | 247.3168     | 169.5839     | 29.3512      |
| 3N             |                         | 51.7077        | 51.7077              | 251.6783         | -101.417     | 37.0467      | 219.4932     |
| 4C             |                         | 9.9551         | 174.0567             | 243.4969         | 274.8957     | 235.549      | 11.72549     |
| 5C             |                         | 34.868         | 149.1438             | 179.5693         | 247.8762     | 170.1243     | 29.43089     |
| 6C             |                         | 47.3664        | 136.6454             | 179.0254         | 241.4403     | 151.2006     | 17.29509     |
| 7C             |                         | 139.5784       | 44.4334              | 38.355           | 59.52499     | 54.91179     | 18.86339     |
| 8C             |                         | 139.5698       | 44.442               | 38.3557          | 59.56979     | 54.8848      | 18.8716      |
| 9C             |                         | 10.0039        | 174.0079             | 243.4959         | 274.7045     | 235.642      | 11.67729     |
| 10C            |                         | 47.696         | 136.3158             | 178.7384         | 240.8909     | 150.8996     | 17.15689     |
| 11C            |                         | 47.5231        | 136.4887             | 178.9158         | 241.24       | 151.0146     | 17.2115      |
| 12C            |                         | 34.966         | 149.0458             | 179.4296         | 247.6366     | 170.0747     | 29.4261      |
| 13C            |                         | 34.6406        | 149.3712             | 179.1588         | 248.1625     | 170.0191     | 29.93199     |
| 14N            |                         | 51.2329        | 51.2329              | 252.1975         | -102.014     | 36.3483      | 219.3646     |
| 15H            |                         | 23.6414        | 8.34215              | 8.0621           | 12.11375     | 9.94525      | 2.967449     |
| 16H            |                         | 23.1336        | 8.849949             | 5.0861           | 13.17635     | 7.914249     | 5.459148     |
| 17H            |                         | 21.4835        | 10.50005             | 5.8132           | 16.79105     | 8.084549     | 6.62455      |
| 18H            |                         | 23.1269        | 8.856649             | 5.1              | 13.17445     | 7.938848     | 5.45665      |
| 19H            |                         | 23.6231        | 8.360449             | 8.0578           | 12.10775     | 9.984949     | 2.988548     |
| 20H            |                         | 28.676         | 3.307549             | 4.8956           | 7.423248     | 2.455549     | 0.04385      |
| 21H            |                         | 28.6733        | 3.310249             | 4.8975           | 7.432348     | 2.453049     | 0.04525      |
| 22H            |                         | 28.672         | 3.311548             | 4.8946           | 7.43215      | 2.453949     | 0.048449     |
| 23H            |                         | 28.6742        | 3.309349             | 4.8947           | 7.426748     | 2.45505      | 0.046148     |
| 24H            |                         | 23.6434        | 8.340149             | 8.0507           | 12.10975     | 9.93775      | 2.973049     |
| 25H            |                         | 23.6353        | 8.348249             | 8.0526           | 12.11245     | 9.952549     | 2.97995      |
| 26H            |                         | 23.1202        | 8.86335              | 5.0907           | 13.18265     | 7.937948     | 5.469549     |
| 27H            |                         | 23.1099        | 8.87365              | 5.1023           | 13.16615     | 7.982649     | 5.47205      |
| 28H            |                         | 21.4878        | 10.49575             | 5.773            | 16.75935     | 8.08075      | 6.647049     |

(b)

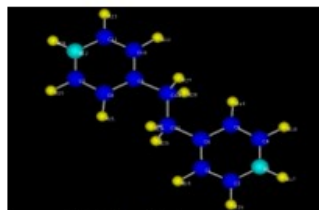

Routet: #p B3LYP/G-311+G\*\* nmr

Comments: Planar bipyrindine cation

nmr2\_nmr

Charge = 2 Multiplicity = 1

Number of

Atoms: 28

| Chemical Shift | Shielding Tensor of TMS | 1H             | 13C                  | 184.0118         |              |              |              |
|----------------|-------------------------|----------------|----------------------|------------------|--------------|--------------|--------------|
| Number         | Atom                    | Shielding (bo) | Chemical Shift (ppm) | Anisotropy (ppm) | XX Component | YY Component | ZZ Component |
| 1C             |                         | 55.4342        | 128.5776             | 167.8092         | 229.6351     | 139.3929     | 16.70479     |
| 2C             |                         | 45.1507        | 138.8611             | 173.3525         | 229.1488     | 164.1416     | 23.29269     |
| 3N             |                         | 65.183         | 65.183               | 234.2293         | -80.8751     | 55.0883      | 221.3359     |
| 4C             |                         | 43.7183        | 140.2935             | 174.6911         | 231.1592     | 165.8885     | 23.8327      |
| 5C             |                         | 60.8906        | 123.1212             | 172.7193         | 225.5323     | 135.8563     | 7.975098     |
| 6C             |                         | 23.4455        | 160.5663             | 233.5914         | 259.9722     | 216.8879     | 4.838699     |
| 7C             |                         | 43.7146        | 140.2972             | 174.7288         | 231.2242     | 165.8561     | 23.8114      |
| 8C             |                         | 60.8914        | 123.1204             | 172.6583         | 225.5816     | 135.7647     | 8.014801     |
| 9C             |                         | 23.485         | 160.5268             | 233.5745         | 259.9001     | 216.8699     | 4.810501     |
| 10C            |                         | 55.497         | 128.5148             | 167.7552         | 229.5531     | 139.3132     | 16.67799     |
| 11C            |                         | 45.177         | 138.8348             | 173.3687         | 229.2059     | 164.0428     | 23.2556      |
| 12N            |                         | 65.2507        | 65.2507              | 234.0756         | -80.665      | 55.1161      | 221.3011     |
| 13C            |                         | 147.2791       | 36.7327              | 25.6878          | 51.2802      | 39.31039     | 19.6075      |
| 14C            |                         | 147.1779       | 36.83389             | 25.727           | 51.5486      | 39.2706      | 19.6826      |
| 15H            |                         | 23.6633        | 8.32025              | 8.1928           | 13.01485     | 9.08745      | 2.85845      |
| 16H            |                         | 23.4151        | 8.568449             | 4.6082           | 13.81065     | 6.39835      | 5.496349     |
| 17H            |                         | 21.0191        | 10.96445             | 6.7985           | 17.34515     | 9.116049     | 6.43215      |
| 18H            |                         | 23.392         | 8.591549             | 5.2199           | 13.95475     | 6.708149     | 5.111549     |
| 19H            |                         | 23.8854        | 8.098148             | 9.5829           | 13.65165     | 8.933249     | 1.709549     |
| 20H            |                         | 23.3919        | 8.59165              | 5.2154           | 13.95155     | 6.70875      | 5.11475      |
| 21H            |                         | 23.8851        | 8.09845              | 9.564            | 13.63925     | 8.933649     | 1.722448     |
| 22H            |                         | 23.6646        | 8.318949             | 8.1935           | 13.01215     | 9.08815      | 2.856548     |
| 23H            |                         | 23.4154        | 8.56815              | 4.6067           | 13.80645     | 6.401049     | 5.497049     |
| 24H            |                         | 21.0237        | 10.95985             | 6.811            | 17.34945     | 9.110949     | 6.419149     |
| 25H            |                         | 27.8525        | 4.131048             | 6.353            | 9.886549     | 2.610849     | -0.10425     |
| 26H            |                         | 27.8396        | 4.14395              | 6.3424           | 9.91095      | 2.605249     | -0.08425     |
| 27H            |                         | 27.84          | 4.143549             | 6.3119           | 9.903749     | 2.591249     | -0.06445     |
| 28H            |                         | 27.85          | 4.133549             | 6.3415           | 9.915949     | 2.578749     | -0.09415     |

**Figure S11.** A B3LYP/6311+G\*\* function was used to estimate the  $^{13}\text{C}$  NMR peaks of 1,2-bis(4-pyridyl) ethane in (a) chair and (b) planar form. The highlighted values indicate the conformational changes which were seen in the  $\alpha$  form of crystal **1**.

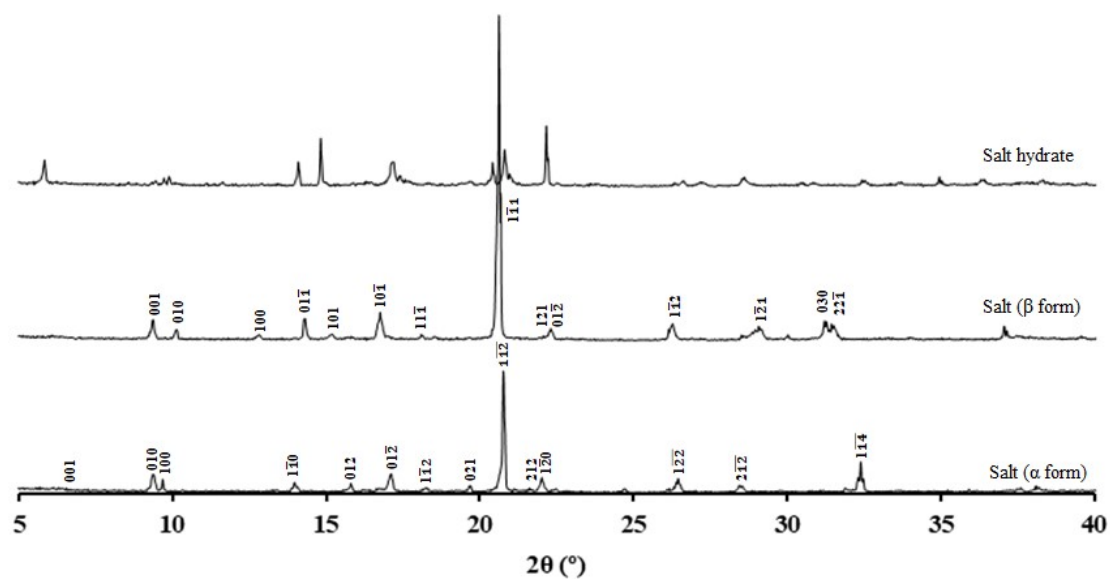

**Figure S12.** Powder X-ray diffraction patterns of the  $\alpha$ ,  $\beta$ , hydrated forms of crystal **1**.

## References

1. S. Takamizawa and Y. Miyamoto, *Angew. Chem.*, 2014, **126**, 7090-7093.
2. S. Takamizawa and Y. Takasaki, *Chem. Sci.*, 2016, **7**, 1527-1534.
3. T. Mutai, T. Sasaki, S. Sakamoto, I. Yoshikawa, H. Houjou, S. Takamizawa, *Nat. Commun.*, 2020, **11**, 1-6.
